# Supplementary material for: Efficient Adhesion Culture of Human Pluripotent Stem Cells Using Laminin Fragments in an Uncoated Manner
Source: PubMed Central journal article supplement (PMC5278368; doi:10.1038/srep41165), 2017-01-30
Supplement: srep41165-s1.pdf [file srep41165-s1.pdf]

## Supplementary Information

### **Efficient Adhesion Culture of Human Pluripotent Stem Cells Using Laminin Fragments in an Uncoated Manner**

Takamichi Miyazaki<sup>1</sup>, Takehisa Isobe<sup>1</sup>, Norio Nakatsuji<sup>1,2</sup>, and Hirofumi Suemori<sup>2,\*</sup>

<sup>1</sup> Institute for Integrated Cell-Material Sciences, Kyoto University, Kyoto 6068501, Japan

<sup>2</sup> Institute for Frontier Life and Medical Sciences, Kyoto University, Kyoto 6068507, Japan

\* Correspondence should be addressed to H.S. ([hsuemori@frontier.kyoto-u.ac.jp](mailto:hsuemori@frontier.kyoto-u.ac.jp))

Supplementary Figures 1 - 3

Supplementary Table 1

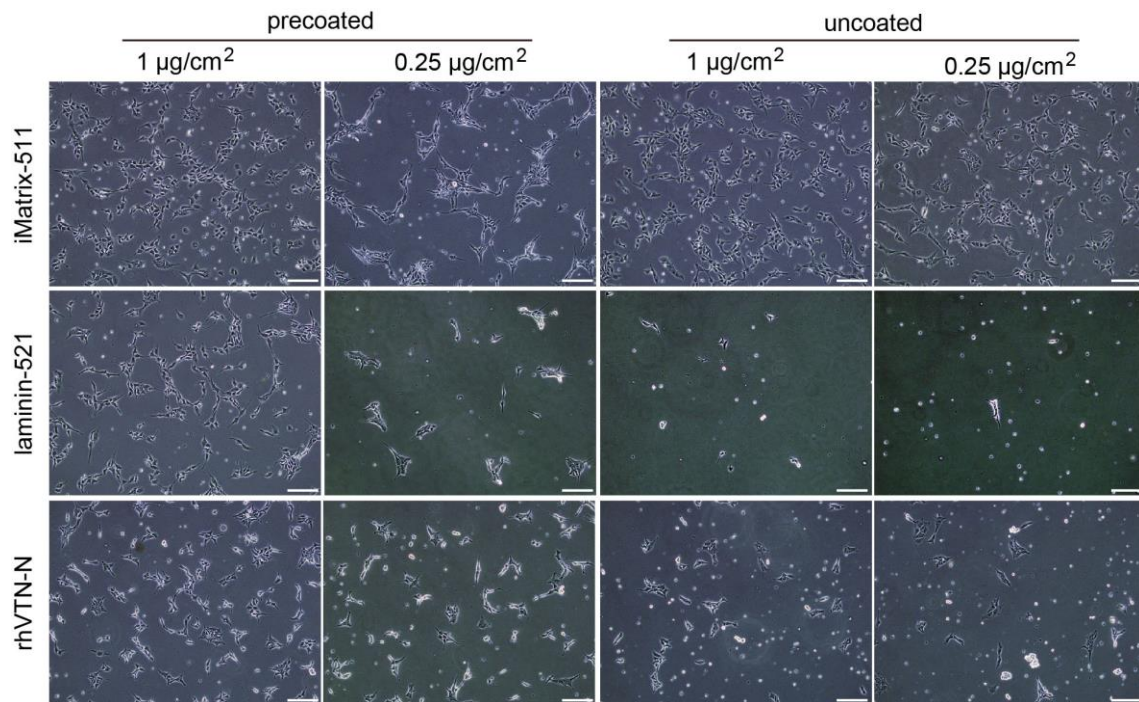

### Supplementary Figure 1

Phase-contrast images of 253G1 iPSCs cultured in precoated and uncoated manners. Images show the aspects of hPSC adhesion at 24 h after seeding in TeSR-E8 medium. Scale bar: 100  $\mu\text{m}$ .

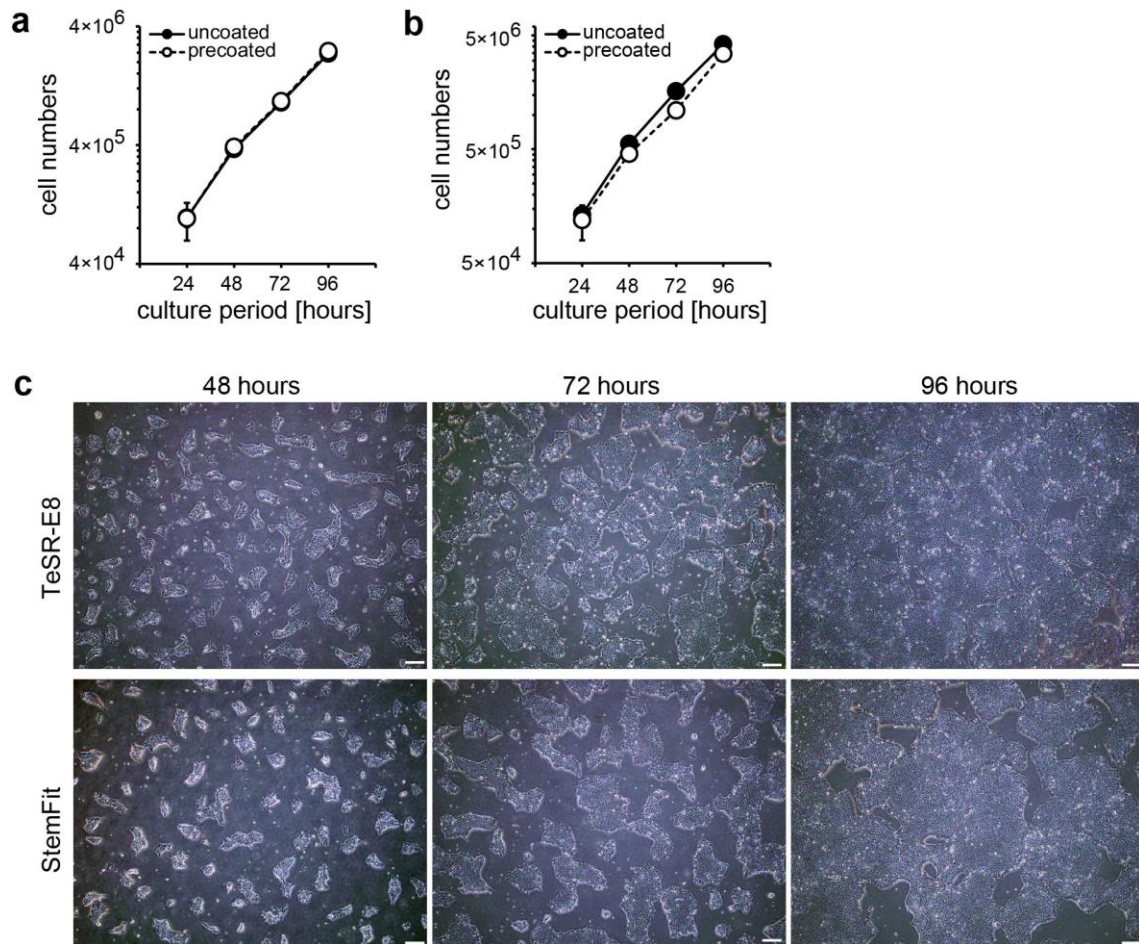

### Supplementary Figure 2

(a, b) Short term growth curves of hPSCs in each culture manner. (a) 253G1 iPSCs in TeSR-E8 medium and (b) 253G1 hiPSCs in StemFit AK03 medium.

(c) Phase-contrast images of 253G1 hiPSCs in TeSR-E8 and StemFit AK03 medium cultured in the uncoated manner. Scale bar: 200  $\mu\text{m}$ .

253G1/TeSRE8

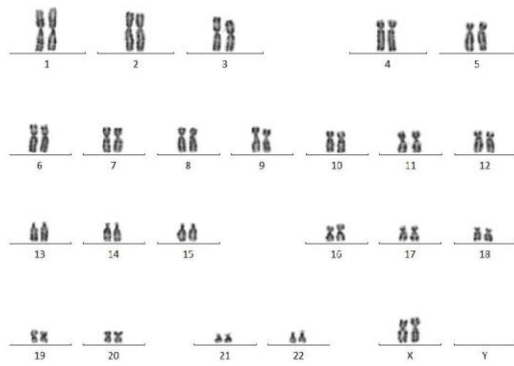

253G1/StemFit

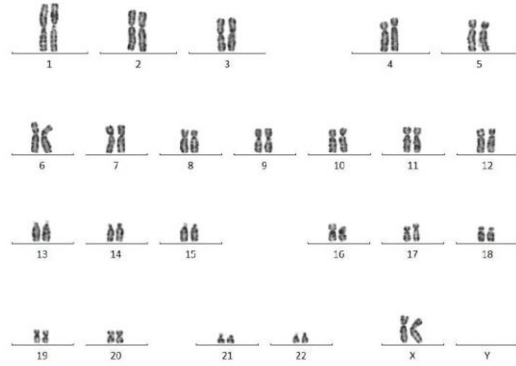

### Supplementary Figure 3

Karyotypes analysed by G-banding. 253G1 iPSCs had a normal karyotype (46, XX).

**Supplementary Table 1: qPCR primer sequences.**

| <b>Primer</b> | <b>Forward Primer 5'-&gt;3'</b> | <b>Reverse Primer 5'-&gt;3'</b> |
|---------------|---------------------------------|---------------------------------|
| DNMT3B        | ACCTCGTGTGGGGAAAGATCA           | CCATCGCCAAACCACTGGA             |
| HESX1         | GCGTGGTGGATCACCCAAT             | CGGCCTCTATACCAACTCAACT          |
| NANOG         | CCCCAGCCTTTACTCTTCCTA           | CCAGGTTGAATTGTTCCAGGTC          |
| POU5F1        | ACATCAAAGCTCTGCAGAAAGAACT       | CTGAATACCTTCCCAAATAGAACCC       |
| SOX2          | GCCGAGTGGAAACTTTTGTCG           | GGCAGCGTGTACTTATCCTTCT          |
| GAPDH         | GAAGGTGAAGGTCGGAGTC             | GAAGATGGTGATGGGATTTC            |
